# Supplementary material
Source: PubMed Central journal article supplement (PMC4776020)
Supplement: AAC.01123-15_zac002164834so1.pdf [file AAC.01123-15_zac002164834so1.pdf]

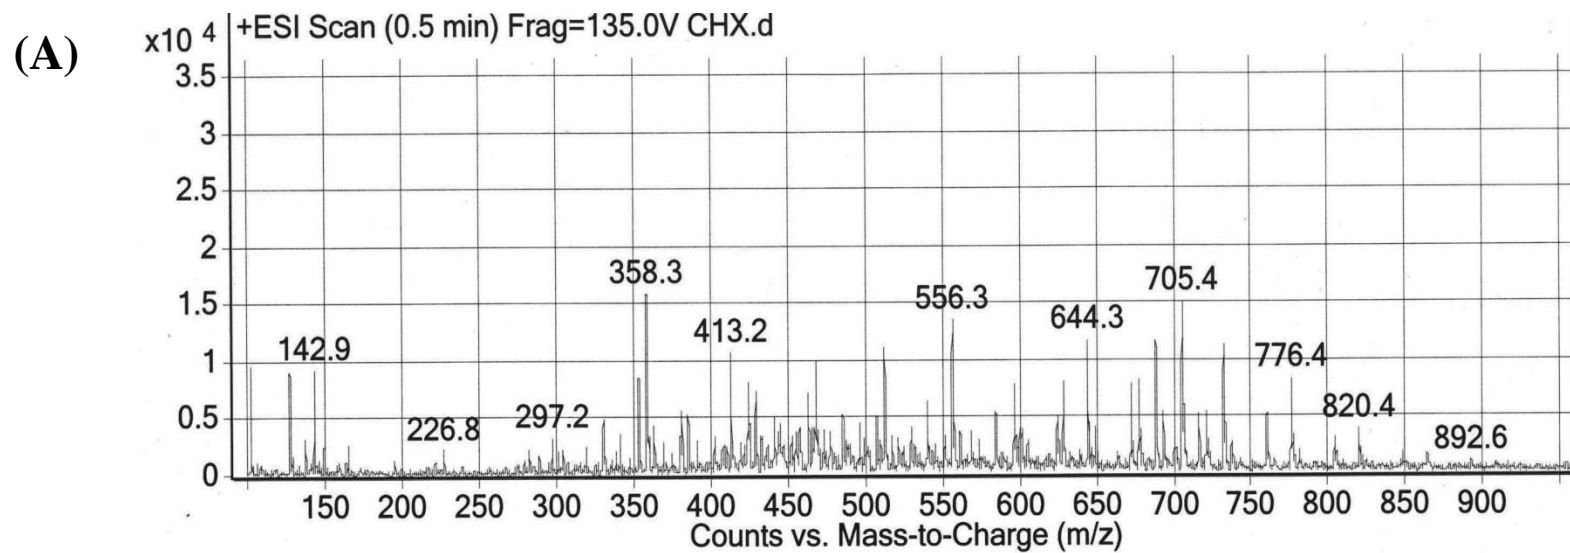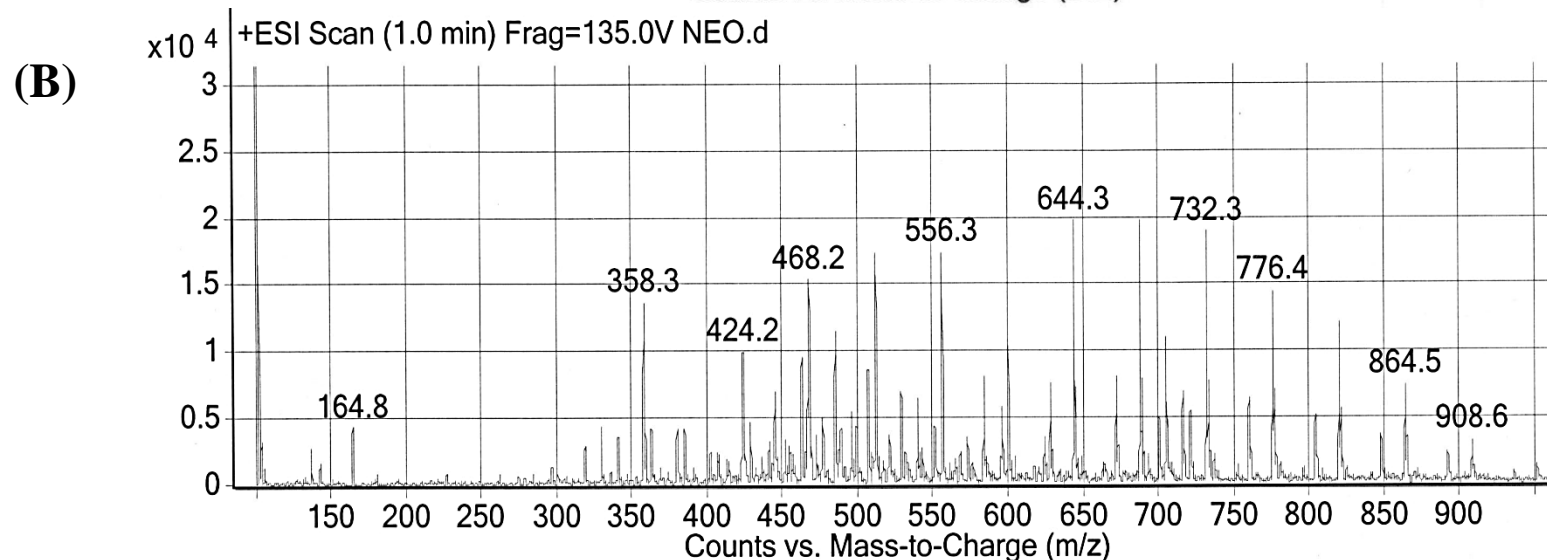

**Supplementary Figure:** Representative electron spray ionization mass spectrometry showed no peak of chlorhexidine and neomycin at 505 and 614m/z respectively. In order to determine the drug amount electron spray ionization mass spectrometry was performed as described in “Materials and Methods”. Briefly, colloidal solution was collected in a 1.5 mL Eppendorf tube and centrifuged at 11,000 x g. Next, centrifugate was separated and 0.1% trifluoroacetic acid was added. After this, the sample was injected for mass spectrometry analysis and mass spectrum was obtained. **(A)** The results showed no peak of chlorhexidine alone at 505m/z indicating the complete utilization of drugs. **(B)** The results showed no peak of neomycin alone at 614m/z indicating the complete utilization of drugs.
